# Supplementary material for: Synthesis of sub-nanometer gold particles on modified silica
Source: Royal Society of Chemistry journal article supplement (doi:10.1039/c5dt04957a), 2016-01-01
Supplement: c5dt04957a1.pdf [file c5dt04957a1.pdf]

## Electronic Supporting Information

### Synthesis of sub-nanometer gold particles on modified silica

Amaia Beloqui Redondo,<sup>a</sup> Marco Ranocchiari,<sup>b</sup> Jeroen A. van Bokhoven<sup>\*a,b</sup>

<sup>a</sup>Institute for Chemical and Bioengineering, ETH Zürich, Vladimir-Prelog-Weg 1, CH-8093 Zurich,  
Switzerland

<sup>b</sup>Laboratory for Catalysis and Sustainable Chemistry, Paul Scherrer Institut, CH-5232 Villigen,  
Switzerland

\*jeroen.vanbokhoven@chem.ethz.ch

## Nitrogen Physisorption

Table S1. Parameters derived from nitrogen physisorption for all SBA-15 supported materials.

| Entry | Sample <sup>[a]</sup> | S <sub>BET</sub> (m <sup>2</sup> /g) | V <sub>tot</sub> (cm <sup>3</sup> /g) |
|-------|-----------------------|--------------------------------------|---------------------------------------|
| 1     | Au/N-SBA-15_K(9.5)    | 385                                  | 0.59                                  |
| 2     | Au/N-SBA-15_K(11)     | 458                                  | 0.75                                  |
| 3     | Au/N-SBA-15_A(11)     | 314                                  | 0.39                                  |
| 4     | Au/N-SBA-15           | 238                                  | 0.35                                  |
| 5     | Au/SBA-15_K(9.5)      | 454                                  | 0.57                                  |
| 6     | Au/SBA-15_K(11)       | 495                                  | 0.87                                  |
| 7     | Au/SBA-15_A(11)       | 433                                  | 0.73                                  |
| 8     | Au/SBA-15             | 470                                  | 0.63                                  |
| 9     | N-SBA-15              | 297                                  | 0.43                                  |
| 10    | SBA-15                | 533                                  | 0.68                                  |

<sup>[a]</sup> Sample legend: K = potassium carbonate, A = ammonia, pH values in parentheses.

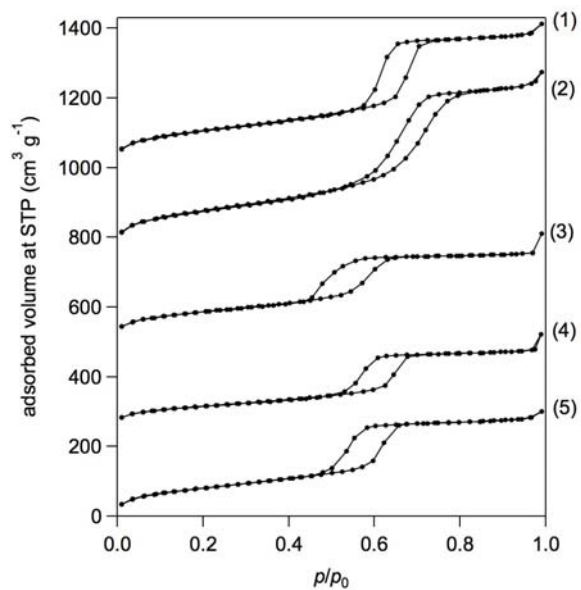

Figure S1. Nitrogen adsorption-desorption isotherms of (1) Au/N-SBA-15\_K(9.5), (2) Au/N-SBA-15\_K(11), (3) Au/N-SBA-15\_A(11), (4) Au/N-SBA-15, and (5) N-SBA-15. Isotherms (1)-(4) have been shifted upwards by 250 units consecutively.

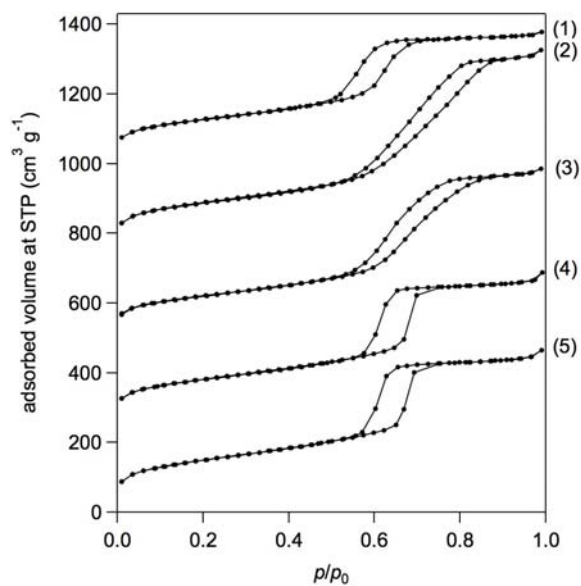

Figure S2. Nitrogen adsorption-desorption isotherms of (1) Au/SBA-15\_K(9.5), (2) Au/SBA-15\_K(11), (3) Au/SBA-15\_A(11), (4) Au/SBA-15, and (5) SBA-15. Isotherms (1)-(4) have been shifted upwards by 250 units consecutively.

### Small-angle X-ray Diffraction Patterns

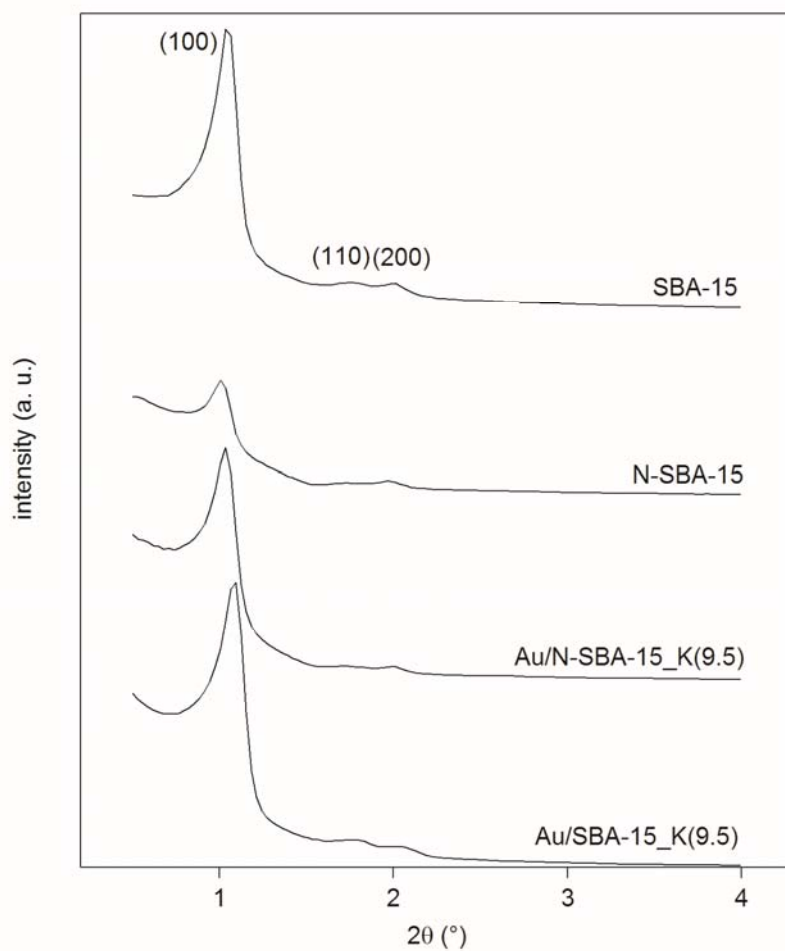

Figure S3. Small-angle XRD patterns of unmodified SBA-15, N-SBA-15, Au/SBA-15\_K(9.5) and Au/SBA-15\_K(9.5).

## Catalytic Dehydrogenation of Formic Acid

Table S2. Temperature and carbon monoxide selectivity at 50% conversion for all catalysts.

| Entry | Sample             | Temperature at 50% conversion [°C] | Carbon monoxide selectivity at 50% conversion [%] |
|-------|--------------------|------------------------------------|---------------------------------------------------|
| 1     | Au/N-SBA-15_K(9.5) | 90                                 | 0                                                 |
| 2     | Au/N-SBA-15_K(11)  | 100                                | 0                                                 |
| 3     | Au/N-SBA-15_A(11)  | 90                                 | 0                                                 |
| 4     | Au/N-SBA-15        | 125                                | 0                                                 |
| 5     | Au/SBA-15_K(9.5)   | 210                                | 21                                                |
| 6     | Au/SBA-15_K(11)    | 260                                | 16                                                |
| 7     | Au/SBA-15_A(11)    | 100                                | 0                                                 |
| 8     | Au/SBA-15          | 220                                | 12                                                |

## Particle Size after Catalysis

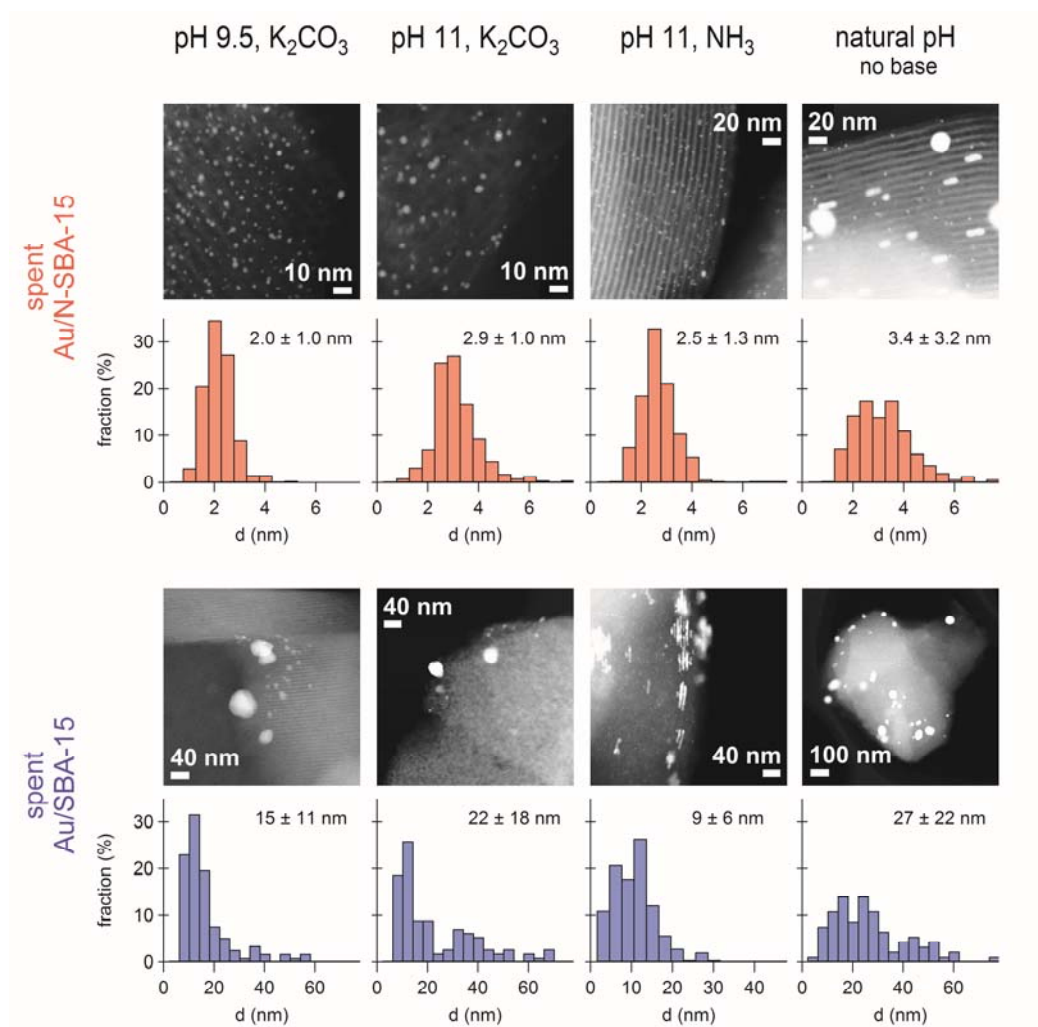

Figure S4. STEM images for gold catalysts on amine-functionalized N-SBA-15 (top) and SBA-15 (bottom) after catalysis. The corresponding particle size histograms and average particle size and standard deviation are included.
